# Supplementary material for: Freezing-enhanced chlorination of organic pollutants for water treatment
Source: Royal Society of Chemistry journal article supplement (doi:10.1039/d4ra00081a), 2024-01-01
Supplement: d4ra00081a1.pdf [file d4ra00081a1.pdf]

## Supplementary Information

### Freezing-enhanced chlorination of organic pollutants for water treatment

Duanyang Wu <sup>a</sup>, Junxue Li <sup>a</sup>, Jing Xu<sup>b</sup>, Wei Cheng <sup>a, \*</sup>

<sup>a</sup>College of Resources and Environmental Science, South-Central Minzu University,  
Wuhan 430074, P.R. China

<sup>b</sup>State Key Laboratory of Water Resources and Hydropower Engineering Science,  
Wuhan University, Wuhan, 430072, PR China

\* Corresponding author

E-mail address: [wei.cheng@scuec.edu.cn](mailto:wei.cheng@scuec.edu.cn)

5 pages, 6 Fig.s, 1 Table

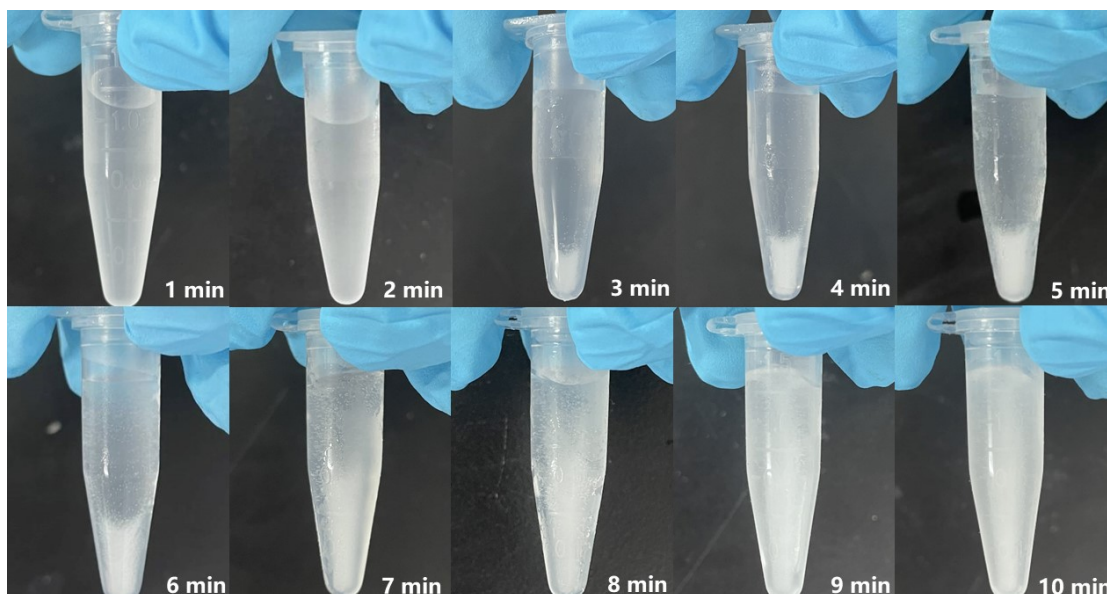

**Fig. S1.** Degree of solidification of the solution containing NaClO and CA in the first 10 minutes. Experimental conditions were as follows: Experimental conditions:  $[\text{NaClO}] = 52 \mu\text{M}$ ,  $[\text{CA}] = 20 \mu\text{M}$ , pH 4 and freezing temperature =  $-20 \text{ }^\circ\text{C}$ .

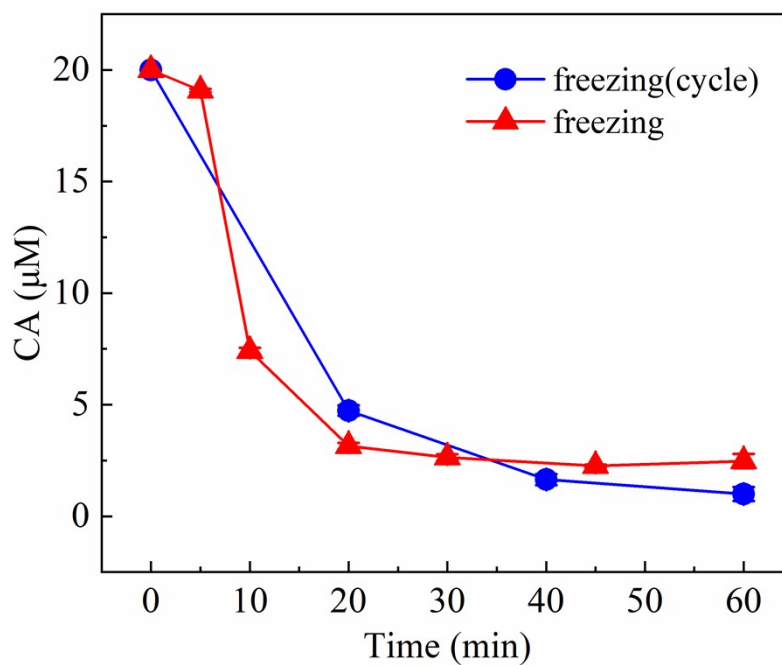

**Fig. S2.** Comparison of CA degradation by chlorine during freezing for 60 min and that under three repeated freezing-thaw cycles (each cycle lasting 20 minutes). Experimental conditions:  $[\text{NaClO}] = 52 \mu\text{M}$ ,  $[\text{CA}] = 20 \mu\text{M}$ , pH 3, and freezing temperature =  $-20 \text{ }^\circ\text{C}$ .

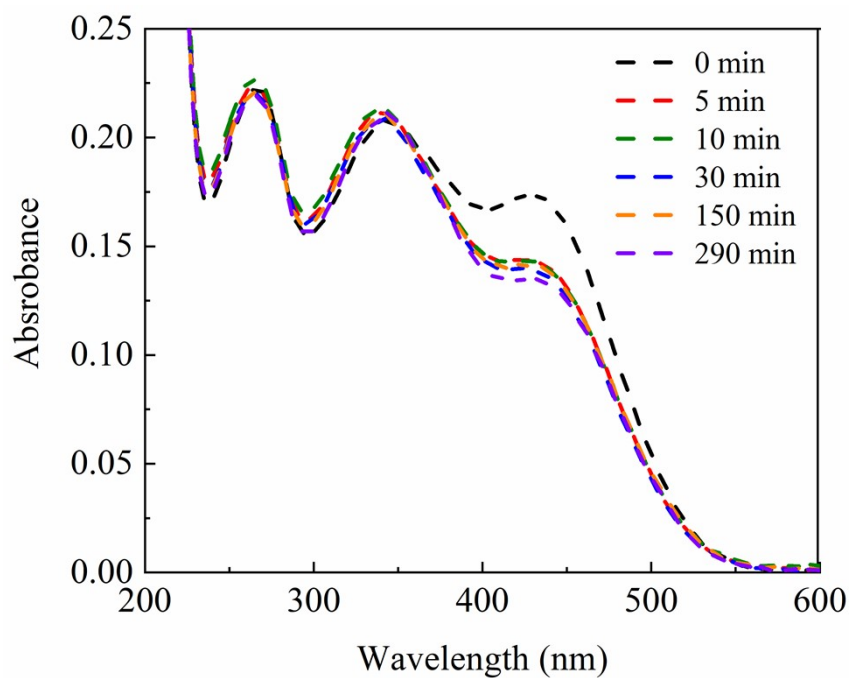

**Fig. S3.** The UV-vis absorption spectra of CR during the freezing procedure was monitored over a time span ranging from 0 to 290 minutes with the presence of Chlorine. Experimental conditions:  $[\text{NaClO}] = 52 \mu\text{M}$ ,  $[\text{CR}] = 20 \mu\text{M}$ ,  $[\text{CA}] = 20 \mu\text{M}$ , and freezing temperature =  $-20 \text{ }^\circ\text{C}$ .

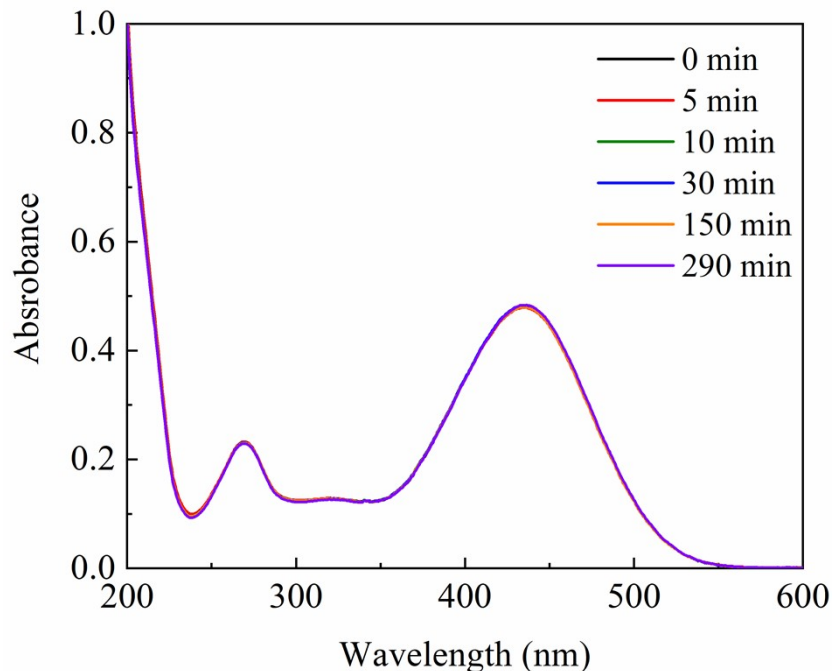

**Fig. S4.** The UV-vis absorption spectra of CR during the freezing procedure was monitored over a time span ranging from 0 to 290 minutes with the absence of Chlorine. Experimental conditions:  $[\text{CR}] = 20 \mu\text{M}$ ,  $[\text{CA}] = 20 \mu\text{M}$ , and freezing temperature =  $-20 \text{ }^\circ\text{C}$ .

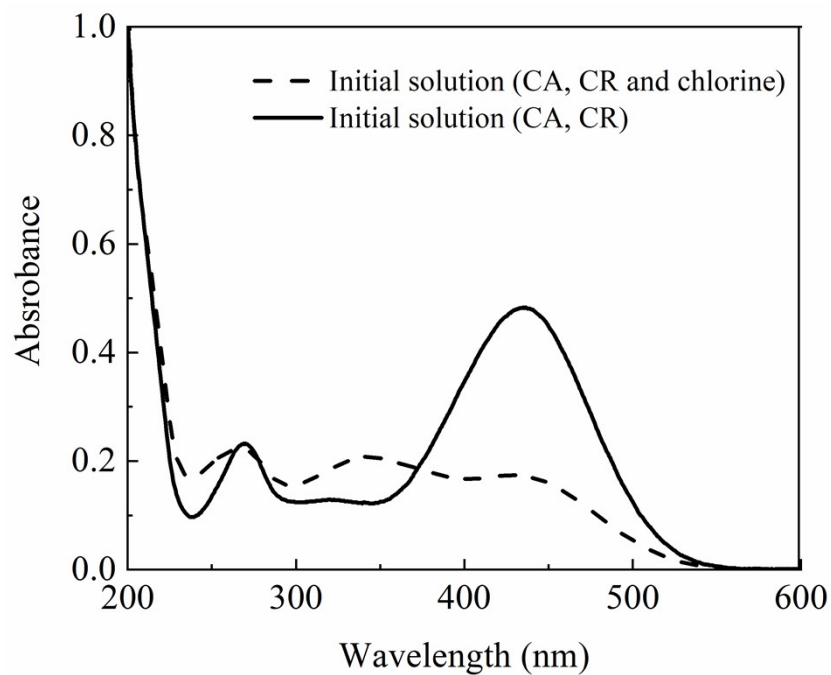

**Fig. S5.** The UV-vis absorption spectra of initial solution was been compared, which included CA and CR, under two distinct conditions: in the presence of chlorine and in its absence. Experimental conditions:  $[CR] = 20 \mu\text{M}$ ,  $[CA] = 20 \mu\text{M}$ , and freezing temperature =  $-20 \text{ }^\circ\text{C}$ .

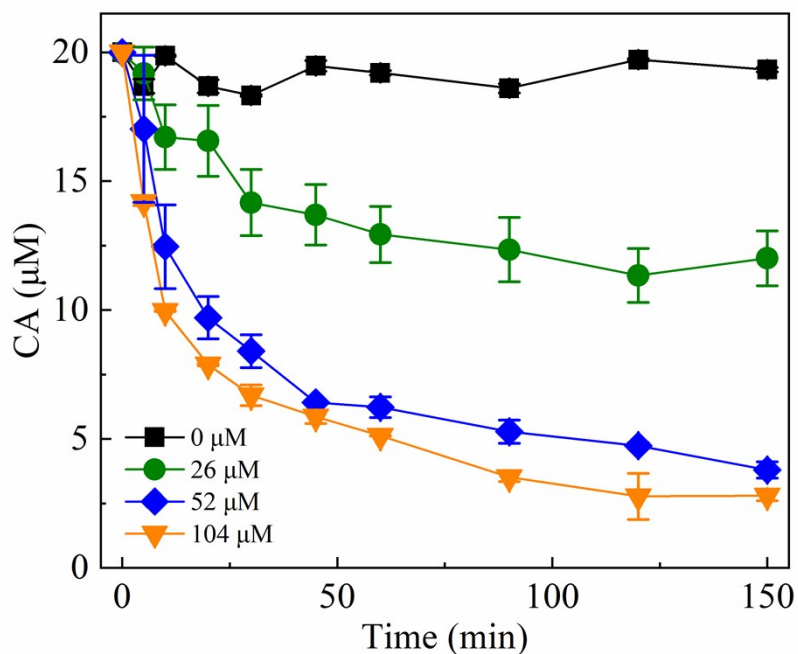

**Fig. S6.** Effect of NaClO concentration on the NaClO-mediated degradation of CA during freezing. Experimental conditions:  $[\text{NaClO}] = 0\text{-}104 \mu\text{M}$ ,  $[CA] = 20 \mu\text{M}$ , pH 3, and freezing temperature =  $-20 \text{ }^\circ\text{C}$ .

**Table S1.** The detailed HPLC method of DMOB, PE, CBZ and CA.

| <b>Contaminants</b> | <b>Mobile Phase (v/v)</b>                          | <b>Wavelength</b> |
|---------------------|----------------------------------------------------|-------------------|
| <b>DMOB</b>         | water/acetonitrile=40/60                           | 286 nm            |
| <b>PE</b>           | water/methanol=30/70                               | 270 nm            |
| <b>CBZ</b>          | water/acetonitrile=40/60                           | 280 nm            |
| <b>CA</b>           | water/acetonitrile(contain 0.1% formic acid)=60/40 | 230 nm            |
